# Supplementary material for: Inverse modelling of the Chernobyl source term using atmospheric concentration and deposition measurements
Source: Copernicus journal article supplement (doi:10.5194/acp-2017-330), 2017-04-18
Supplement: Supplementary file 1 [file acp-2017-330-supplement.zip]

# **Inverse modelling of the Chernobyl source term using atmospheric concentration and deposition measurements**

**Nikolaos Evangeliou<sup>1,\*</sup>, Thomas Hamburger<sup>1,‡</sup>, Anne Cozic<sup>2</sup>, Yves Balkanski<sup>2</sup>, Andreas Stohl<sup>1</sup>**

[1] NILU – Norwegian Institute for Air Research, Department of Atmospheric and Climate Research (ATMOS), Kjeller, Norway.

[2] CEA-UVSQ-CNRS UMR 8212, Laboratoire des Sciences du Climat et de l'Environnement (LSCE), Institut Pierre et Simon Laplace, L'Orme des Merisiers, F-91191 Gif-sur-Yvette Cedex, France.

<sup>‡</sup> Now in: BfS - Bundesamt für Strahlenschutz, Section SW 2.2, Decision Support Systems, D-85764, Oberschleißheim, Germany.

\*Correspondence to: N. Evangeliou ([Nikolaos.Evangeliou@nilu.no](mailto:Nikolaos.Evangeliou@nilu.no))

1 SUPPLEMENTARY FIGURES AND LEGENDS

2

DEPOSITION OF CHERNOBYL RADIONUCLIDES  
USING PRIOR EMISSIONS

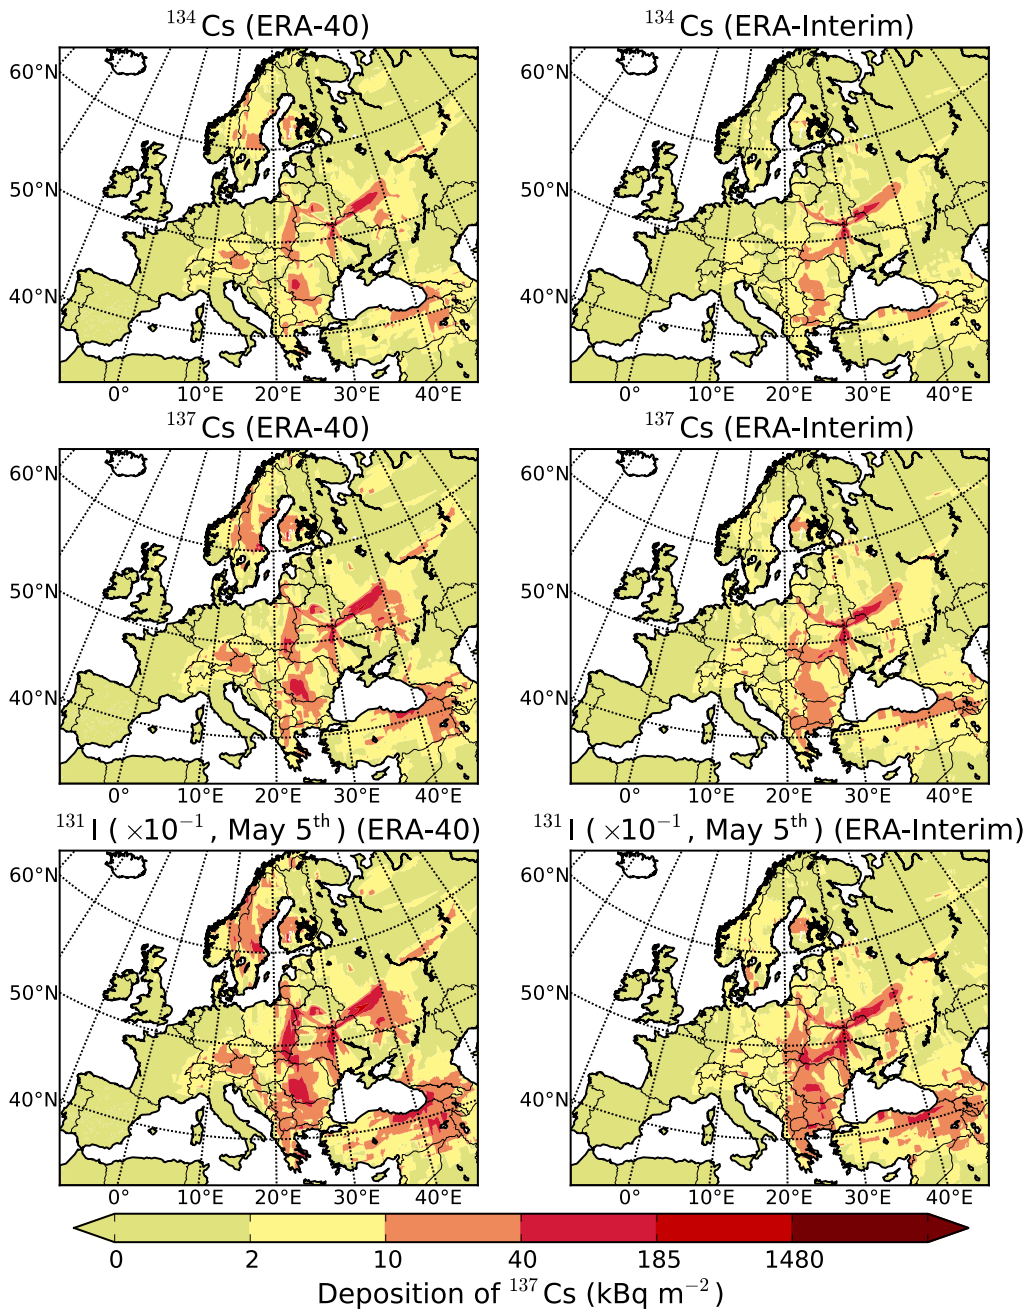

3

4 **Figure S 1.** Deposition of  $^{134}\text{Cs}$ ,  $^{137}\text{Cs}$  and  $^{131}\text{I}$  based on the prior emissions used in the  
5 present inversion using ERA-40 and ERA-Interim meteorological datasets (Dee et al., 2011;  
6 Uppala et al., 2005).

7

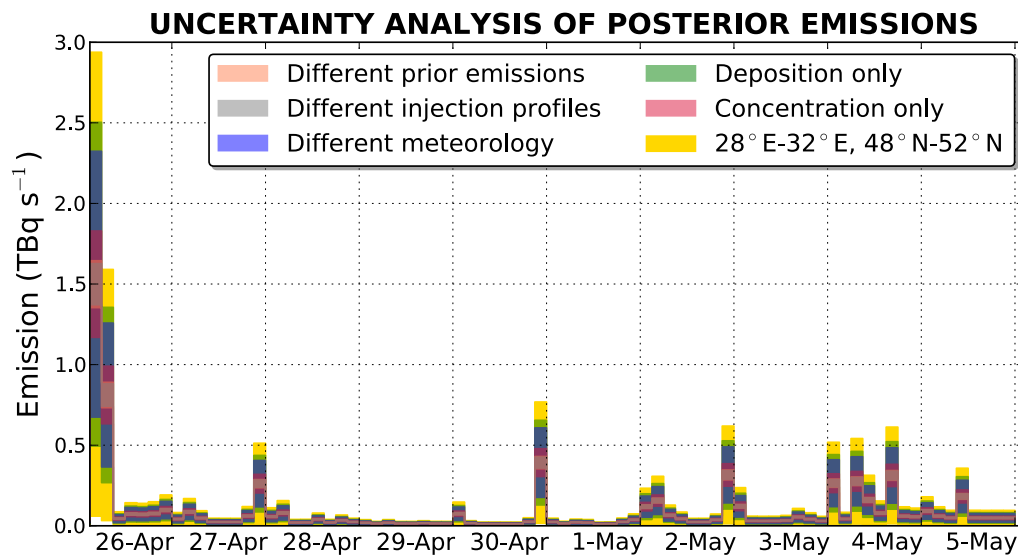

**Figure S 2.** Sensitivity of the inversion of  $^{137}\text{Cs}$  to modification of different parameters. Sensitivity tests accounted for (a) six different prior source terms, (b) three different injection profiles in the prior emissions, (c) two different meteorological datasets (ECMWF ERA-40 and ERA-Interim), (d) only deposition observations or (e) only activity concentrations and (f) only observations (both concentrations and deposition densities) from areas close to the NPP (28°E–32°E, 48°N–52°N). Uncertainties for each case are plotted as step function showing the range of uncertainty for every time step (TBq s<sup>-1</sup>).
